# Supplementary material for: Identification of Terpene Compositions in the Leaves and Inflorescences of Hybrid Cannabis Species Using Headspace-Gas Chromatography/Mass Spectrometry
Source: MDPI journal article supplement (doi:10.3390/molecules28248082), 2023-12-14
Supplement: s1 [file s1]

## **Supplementary Materials**

### **Identification of Terpene Compositions in the Leaves and Inflorescences of Cybrid *Cannabis* Species Using Headspace-Gas Chromatography/Mass Spectrometry**

**Sangin Lee<sup>a</sup>, Eun Jae Kim<sup>a</sup>, Eunjeong Kwon<sup>a</sup>, Seo Jeong Oh<sup>a</sup>, Mansoo Cho<sup>b</sup>, Chul Min**

**Kim<sup>c</sup>, Wonwoong Lee<sup>d,\*</sup>, Jongki Hong<sup>a,\*</sup>**

<sup>a</sup>College of Pharmacy, Kyung Hee University, Seoul 02447, Republic of Korea

<sup>b</sup>Graduate school of Techno Design, Kookmin University, Seoul 02707, Republic of Korea

<sup>c</sup>Department of Horticulture Industry, Wonkwang University, Iksan 54538, Republic of Korea

<sup>d</sup>Research Institute of Pharmaceutical Sciences, College of Pharmacy, Woosuk University,  
Wanju 55338, Republic of Korea

\* Corresponding author: Tel: +82-2-961-9255; Fax: +82-2-961-0357;

E-mail: [jhong@khu.ac.kr](mailto:jhong@khu.ac.kr)

\* Co-corresponding author: Tel: +82-63-290-1573;

E-mail: [wwlee@woosuk.ac.kr](mailto:wwlee@woosuk.ac.kr)

**Figure S1. Total ion chromatograms of terpenes in leaves of Victory at different incubation temperature of (a) 60°C, (b) 80°C, (c) 100°C, and (d) 120°C.**

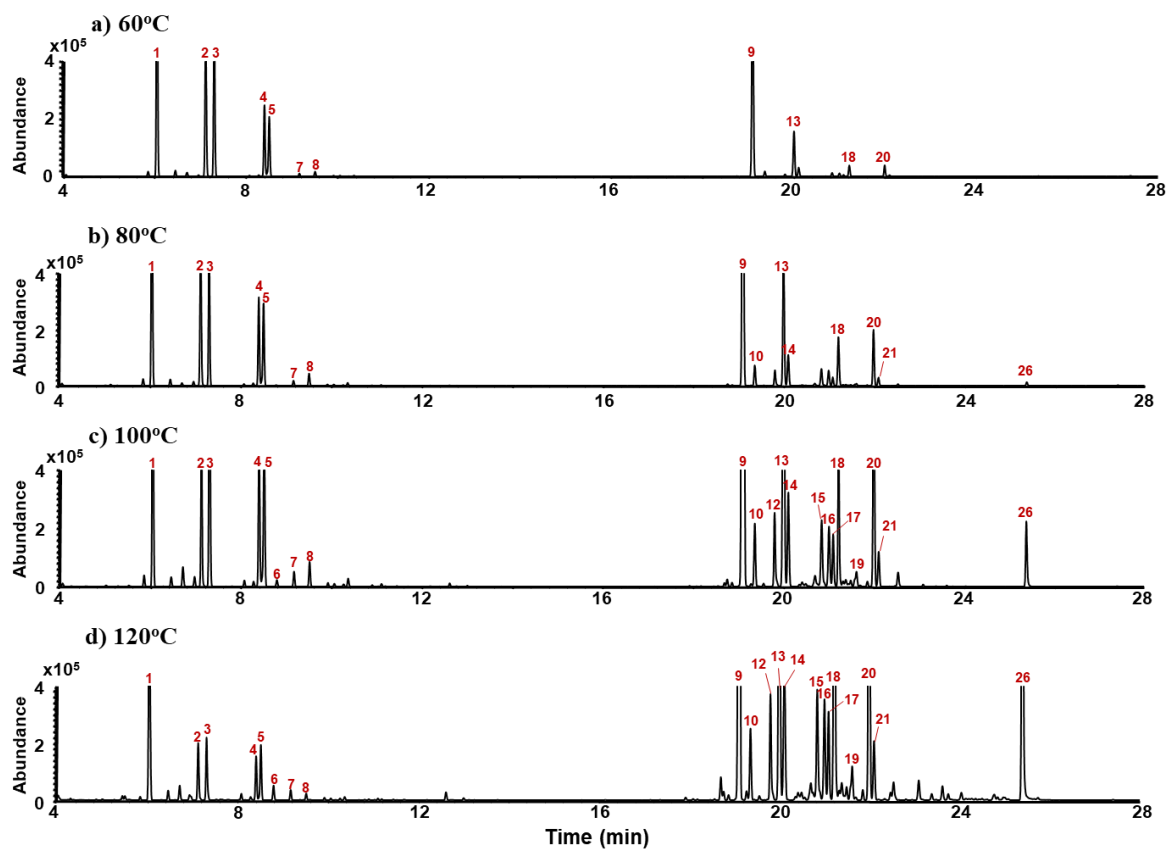

**Figure S2. Cluster dendrogram of leaves and inflorescences of hybrid *Cannabis* using relative abundances of peak areas for 26 terpenes.**

Numbers were identified as follows: 1. Cherry Blossom leaf, 2. V1 leaf, 3. V4 leaf, 4. White Widow leaf, 5. Chung Sam leaf, 6. Blue Dream leaf, 7. Bubble Gum leaf, 8. Purple leaf, 9. Victory leaf, 10. Cherry Blossom inflorescence, 11. V1 inflorescence, 12. V4 inflorescence, 13. White Widow inflorescence, 14. Chung Sam inflorescence, 15. Blue Dream inflorescence, 16. Bubble Gum inflorescence.

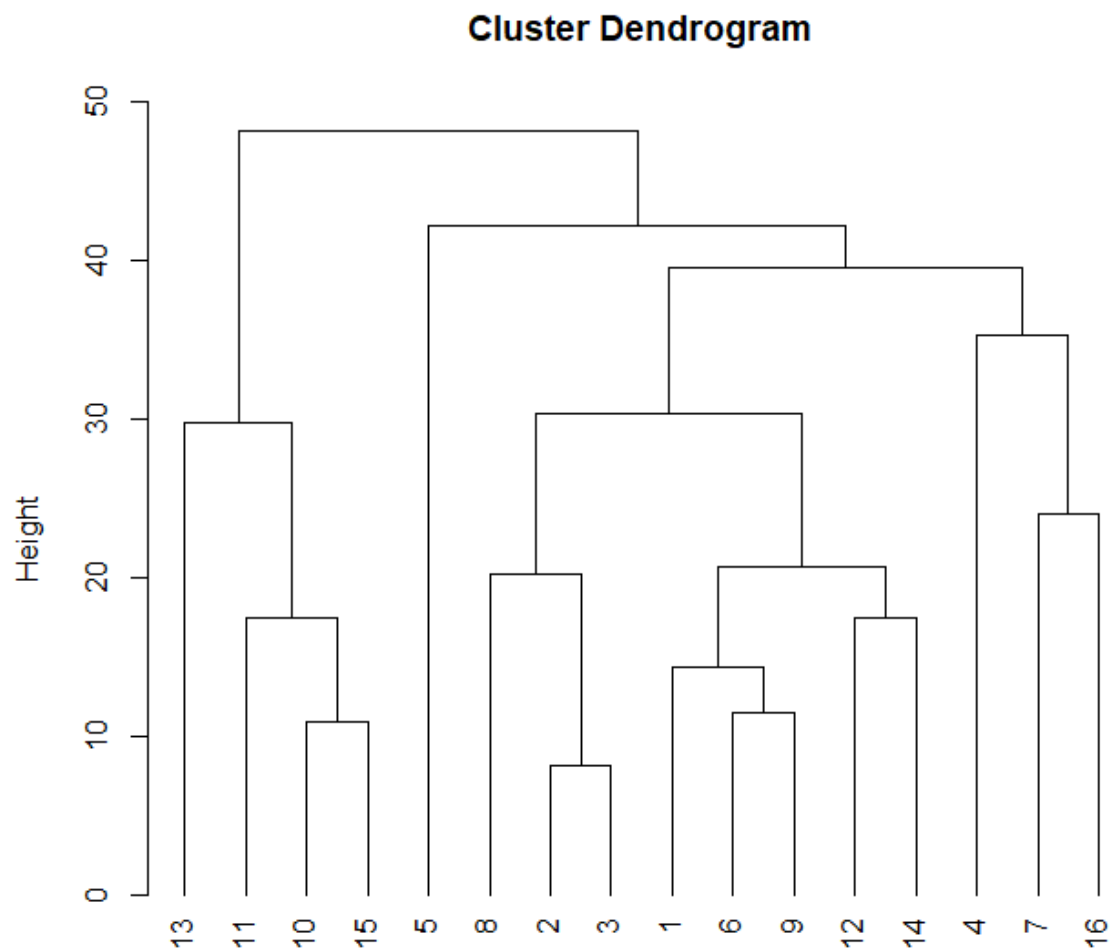

**Table S1. Analytical characteristics of the HS-GC/MS method for 6 major terpenes.**

| Terpenes        | Extract ion<br>(m/z) | LOQ<br>(ng/mL) | Linearity        |                | Precision        |                  | Accuracy       |                 |                 |
|-----------------|----------------------|----------------|------------------|----------------|------------------|------------------|----------------|-----------------|-----------------|
|                 |                      |                | Range<br>(µg/mL) | r <sup>2</sup> | Intra-day<br>(%) | Inter-day<br>(%) | 5 µg/mL<br>(%) | 10 µg/mL<br>(%) | 20 µg/mL<br>(%) |
| α-Pinene        | 93                   | 10             | 1 - 250          | 0.9954         | 3.02±0.91        | 6.48±1.21        | 102.01±0.533   | 103.41±2.212    | 98.98±2.534     |
| β-Pinene        | 93                   | 10             | 1-250            | 0.9956         | 3.97±1.021       | 5.78±0.854       | 100.74±2.95    | 101.52±1.51     | 104.92±1.36     |
| Myrcene         | 93                   | 100            | 1 – 500          | 0.9986         | 4.47±1.59        | 6.55±1.64        | 82.66±0.62     | 92.25±2.705     | 96.00±1.521     |
| Limonene        | 68                   | 10             | 1-250            | 0.9976         | 2.23±0.49        | 4.48±1.42        | 102.10±2.47    | 102.39±2.16     | 103.84±2.96     |
| β-Caryophyllene | 93                   | 10             | 1 – 250          | 0.9976         | 8.01±1.40        | 10.19±1.06       | 108.66±2.86    | 111.56±12.054   | 108.75±3.15     |
| α-Humulene      | 93                   | 10             | 1 - 250          | 0.9961         | 2.90±0.89        | 3.29±1.13        | 86.31±1.774    | 94.87±2.82      | 104.10±8.297    |

All precision and accuracy data were obtained by analysis in triplicate.
